1 **Competitive exclusion of uropathogenic *E. coli* biofilm by *Salmonella* through**  
2 **matrix inhibition**

3 Sandeep Miryala<sup>1,2,3</sup>, S Chandramohan<sup>1,3</sup>, C. S. Srinandan\*<sup>1,2,3</sup>

4 <sup>1</sup>Biofilm Biology Lab, <sup>2</sup>Centre for Research in Infectious Diseases

5 <sup>3</sup>School of Chemical and Biotechnology, SASTRA Deemed University,

6 Thanjavur, Tamil Nadu, India

7

8

9

10 \* Correspondence: [srinandan@scbt.sastra.edu](mailto:srinandan@scbt.sastra.edu); [srinandan@gmail.com](mailto:srinandan@gmail.com)

11

12

13

14

15

16

17

18

## 19 **Summary**

20 Biofilm is a predominant lifestyle of bacteria in host and non-host environments with cell  
21 collectives and extracellular matrix as the defining principles of biofilm. Several factors trigger  
22 biofilm formation including response to competition. Urinary tract infections (UTI) are highly  
23 prevalent worldwide and mainly caused by uropathogenic *E. coli* (UPEC), which progresses into  
24 chronic form due to the biofilm formation by the pathogen. In this study, we hypothesized that  
25 competition for territorial space could occur between species by intervening in the biofilm matrix  
26 production, particularly of UPEC, thereby reducing its colonizing ability. UPEC colony displays  
27 different morphology in congo red media based on matrix production, which we exploited for  
28 screening bacterial isolates capable of inhibiting the matrix. This was validated by using the cell-  
29 free supernatants of the isolates to impair UPEC biofilm. Isolates that inhibited matrix production  
30 belonged to species of *Shigella*, *Escherichia*, *Enterobacter*, and *Salmonella* from  
31 Enterobacteriaceae family. Competition experiments between the isolates and UPEC revealed  
32 spiteful interactions particularly during biofilm formation, indicating fierce competition for  
33 territorial space colonization. The isolate *Salmonella enterica* B1 could competitively exclude  
34 UPEC in the biofilm. Altogether, we show that interference competition by matrix inhibition  
35 occurs as a strategy by bacteria to colonize territorial space.

36

37

38

39

## 40 **Introduction**

41 Urinary tract infections (UTIs) are prevalent in large scale among the human population, with  
42 about 150 million people worldwide getting infected by UTI annually (Flores-Mireles *et al.*, 2015).  
43 Uropathogenic *E. coli* (UPEC) is the predominant causative agent in UTI and recurrent UTI (rUTI)  
44 is a common and challenging problem causing substantial morbidity (Glover *et al.*, 2014). Biofilm  
45 plays a key role in UPEC pathogenesis that cause persistence of infection (Soto *et al.*, 2006;  
46 Tamadonfar *et al.*, 2019). Biofilm formation on urinary catheters are a significant problem globally  
47 that is responsible for 40% of nosocomial infections and is extremely difficult to treat (Walker *et*  
48 *al.*, 2019).

49 Biofilm matrix acts as a physical barrier to protect the cells from predation, radiation, desiccation,  
50 resistance/tolerance towards the antimicrobials including cells of the immune system, and matrix  
51 also provide biofilm cells the advantage in accessing nutrients and other communal benefits  
52 (Xavier and Foster, 2007; Leid 2009; DePas *et al.*, 2014; Srinandan *et al.*, 2015; Dragoš, and  
53 Kovács, 2017). The important matrix components of UPEC are curli and cellulose, where curli are  
54 amyloid proteins that helps in adhesion, cell-surface interaction cell-cell interactions and acts as  
55 structural scaffold to promote biofilm assembly (Shanmugam *et al.*, 2019). On the other hand,  
56 cellulose provides the elastic behavior, 3D structure, tolerance to chlorine, and spatial assortment  
57 in the biofilm (Solano *et al.*, 2002; Srinandan *et al.*, 2015; Serra and Hengge, 2019). A simple *in*  
58 *vitro* assay exists to score the production of curli and cellulose in *E. coli* colonies wherein, the  
59 congo red dye is added to stain the matrix components (Serra and Hengge, 2017).

60 The life of *E. coli* populations is biphasic, that is, it must adapt and survive both in host and non-  
61 host environments. UPEC is found in wastewaters even after treatment that is let off into natural

62 water bodies or soil (Anastasi *et al.*, 2012; Zhi *et al.*, 2019). However, the persistence of UPEC in  
63 nature is not very clear, though *E. coli* populations establish in the soil or water environments  
64 (Blount 2015). In non-host environmental conditions which is stressful and fluctuating, biofilm is  
65 the plausible lifestyle of UPEC survival (DePas *et al.*, 2014). Around 40%-80% of bacteria survive  
66 as biofilms in nature, making it the predominant lifestyle (Flemming and Wuertz, 2019).  
67 Sociobiological interactions are rich in the spatially structured biofilm, among which competition  
68 between species occurs for finite resources. However, Oliveira *et al.*, (2015) showed that biofilm  
69 formation itself is a strategic lifestyle of the cells in response to competition. Thus, it's imperative  
70 that microbial species would compete for territorial colonization by forming biofilm, and as matrix  
71 is important for biofilm formation, we hypothesized that one species may secrete compounds to  
72 inhibit matrix production of the competing species. If there is such kind of competition, the species  
73 that inhibit matrix production of UPEC could potentially be used in biotechnological applications  
74 to control UPEC. Therefore, in this study, we attempted to screen matrix-inhibiting bacteria against  
75 UPEC by using the Congo red method and with further testing, we gain some insights on  
76 competitive exclusion of UPEC by Enterobacteriaceae family.

## 77 **Results and Discussion**

78 Matrix is important for biofilm lifestyle (Flemming *et al.*, 2016), devoid of which bacterial cell  
79 collectives lose the critical features of biofilm like resilience to stress, social interactions,  
80 architecture, etc. In this study, we attempted to isolate matrix-inhibiting bacteria of UPEC from  
81 the soil samples.

82 *Inhibition of UPEC biofilm matrix production by soil bacterial isolates*

83 We designed a novel and simple methodology to screen for bacterial isolates that could specifically  
84 suppress the matrix production in UPEC thereby inhibiting biofilm formation for which we used  
85 a traditional congo red (CR) dye-containing media. The predominant matrix components in *E. coli*  
86 and *Salmonella* are cellulose and curli proteins (Serra and Hengge, 2017). The CR dye binds to  
87 these matrix components to give red color to the colony and when there is no matrix, it displays a  
88 white colony. The former develops a rough colony due to the matrix components and the latter  
89 forms a smooth colony due the absence of cellulose and curli (Serra and Hengge, 2017). Thirty  
90 different soil samples near wastewaters were sampled in a sterile container, serially diluted in PBS  
91 and, plated on CR agar. The UPEC was spotted and we observed color of the colony after  
92 incubation for three days (**Figure 1a**). The UPEC colonies that showed smooth and white (SAW)  
93 morphology were further selected and the peripheral bacterial cells from these colonies were  
94 collected, purified by traditional streak-plate method, and validated with the CR plate assay. Seven  
95 bacterial isolates showed positive results by apparently inhibiting the matrix-production in UPEC,  
96 which were named as A1, B1, C1, F1, P1, T1 and Z1 (**Figure 1b**).

#### 97 *Culture supernatant of the isolates act against UPEC biofilm*

98 Further, we asked if the interference in UPEC matrix production could be due to the competition  
99 sensing (Cornforth and Foster, 2013), for which we collected the cell-free supernatant from colony  
100 (CFSC) of the isolates that were grown in the proximity of UPEC colony. The planktonic growth  
101 of UPEC was affected by the CFSC of the isolates (Figure S1). Except for the CFSC of isolate A1,  
102 all other extracts had a highly significant inhibitory effect on the UPEC planktonic growth (Mann-  
103 Whitney *U* test,  $P < 0.001$ ,  $n = 5$ ). However, the CFSC of all the isolates displayed a significant  
104 inhibitory effect on biofilm formation of UPEC (Mann-Whitney *U* test,  $P < 0.001$ ,  $n = 5$ ),

105 indicating that inhibition of matrix production has a direct consequence on biofilm formation  
106 (Figure S1).

107 We also tested if the independently grown culture supernatant of the isolates without competition  
108 sensing (henceforth called Competition-Sensing Independent Supernatant or CSIS) has effect on  
109 growth and cell assemblages of UPEC. The CSIS were tested for its effect on UPEC biofilm  
110 formation at three different concentration, whereby all the three concentrations substantially  
111 inhibited biofilm formation (Figure S2), but we used 25% for further studies. The CSIS of the  
112 isolate F1 had inhibited the planktonic growth by more than 60%, however other culture  
113 supernatants of the bacterial isolates inhibited 20%-50% of the planktonic growth of UPEC (Figure  
114 2a). Less than 50% of adhesion of UPEC was inhibited by the CSIS (Figure 2b). But, more than  
115 90% of biofilm formation was prevented and more than 70% of biofilm eradication was seen with  
116 the CSIS of all the isolates (Figure 2c and d). Absolute values corresponding to Figures a-d are  
117 shown in Figure S3. The formation of biofilm and dispersal of preformed biofilm, particularly the  
118 submerged biofilm on glass surfaces were also effectively inhibited or eradicated respectively by  
119 the CSIS from all the isolates as visualized by fluorescence microscopy (Figure 2e and S4).

120 Biofilm matrix has many functions among which providing the structural support to the cell  
121 assemblages is one of the most important. Inhibition of the biofilm matrix production may be  
122 involved in inhibiting the UPEC biofilm, but we also observed an effective eradication of  
123 preformed biofilm. Interference competition takes place between microbial species leading to a  
124 chemical warfare between them during competition (Ghoul and Mitri, 2016). The warfare-related  
125 chemical compounds are released out of the producing cell to kill or inhibit the competing species.  
126 Thus, cell-free culture supernatants of bacteria are a rich source of bioactive compounds that could  
127 be exploited in biotechnology. Antibiofilm compounds are also being discovered using the culture

128 supernatants (Valle *et al.*, 2006; Nithya and Pandian 2010). We observed that the matrix-inhibiting  
129 compounds by the selected isolates were produced even without sensing the competition (Figure  
130 2), indicating that these compounds may have other roles too. Competition sensing hypothesis  
131 proposed by Cornforth and Foster (2013) predicts that the physiological response evolves due to  
132 ecological competition. However, in this case the matrix inhibition of UPEC was not in response,  
133 but it could be a physiologically produced metabolite having multiple roles, similar to the  
134 phenazines (Whelan *et al.*, 2006).

### 135 *Physicochemical nature of the culture supernatant*

136 To find the preliminary physicochemical nature of CSIS, it was treated with 2- $\beta$  mercaptoethanol  
137 (BME), trypsin, proteinase K and heat. The treated supernatants were used to check their effect on  
138 matrix production in CR plates, planktonic growth, and biofilm formation of UPEC. Many isolates  
139 lost the capacity to inhibit both cellulose and curli production after domestication in the laboratory  
140 media. However, the culture supernatants of the isolates, A1, P1, T1 and, Z1 turned the proximate  
141 colony of UPEC into pink color (Figure S5a), which indicates that only cellulose is expressed but  
142 not curli (Serra and Hengge, 2017). The culture supernatants from the isolate B1 was consistent in  
143 suppressing both cellulose and curli of UPEC (Figure S5a). The culture supernatants of A1, B1,  
144 P1 and, Z1 when treated with heat, lost its capacity to influence the matrix production of UPEC  
145 (Figure S5a). However, in some instances, the treated culture supernatant had inhibited 70%-90%  
146 of planktonic growth particularly after subjecting it to heat from B1, T1 and Z1, which could also  
147 be seen as zone of inhibition in B1 and T1 in the CR plates (Figure S5a and b). Trypsin treatment  
148 rescued nearly 40% of the inhibitory effect of culture supernatant from isolate B1, but matrix  
149 production was marginally less than control (Figure S5a and c). BME treatment of culture  
150 supernatant of isolate C1 rescued biofilm inhibition, which was also observed in the rescuing

151 matrix production (Figure S5a and c). The extract of isolate F1 showed a zone of inhibition  
152 indicating growth inhibition that was consistent with the planktonic growth inhibitory activity  
153 (Figure S5a and b). Treatment of the extract subjected with BME from isolate P1 also inhibited  
154 more than 70% of planktonic growth of UPEC (Figure S5b). However, more than 50% of matrix  
155 production was rescued when the culture supernatant of P1 was heat-treated. Altogether, these  
156 results showed that matrix suppression and biofilm inhibition from the culture supernatants is not  
157 by proteins except for the supernatant of isolate C1 (Figure S5). We speculate that the mechanism  
158 of inhibition of UPEC matrix or biofilm could be by producing specific polysaccharides that inhibit  
159 matrix gene regulation, similar to that reported Valle et al., (2006) or some small molecules, which  
160 are sensitive to heat. Interference of these molecules in c-di-GMP signaling cannot be ruled out,  
161 as the higher intracellular concentrations of c-di-GMP activate matrix production (Qvortrup *et al.*,  
162 2019).

### 163 *The bacterial isolates that inhibit matrix production belong to Enterobacteriaceae*

164 The seven bacterial isolates that showed matrix-inhibiting activity of UPEC were identified by  
165 using 16S rRNA gene sequencing and analyzing its phylogeny (Figure 3). The 16S rRNA  
166 sequences were submitted to NCBI with accession numbers as shown in Table S1. The isolates  
167 were submitted to National Centre for Microbial Resource, Pune, India (Table S1). The isolate A1  
168 was identified as *Escherichia fergusonii*, B1 as *Salmonella enterica*, C1 belonged to the genus  
169 *Escherichia*, F1 was *E. fergusonii*, isolates P1 and T1 were *Shigella flexneri*, and the isolate Z1  
170 was identified as *Enterobacter cloacae*. All these isolates belonged to Enterobacteriaceae family.  
171 Two general kinds of competition occurs between species, (a) exploitative competition, where the  
172 resources could be highly exploited by one species thus reducing the fitness payoff in the other  
173 and, (b) interference competition, where one species interferes directly into the growth of other



174 species by inhibiting or killing it (Ghoul and Mitri, 2016). Ecological competition among the  
175 Enterobacteriaceae family is intense because the resources used by its members are similar. For  
176 example, exploitative competition for iron emerges between Enterobacteriaceae group, in which  
177 the species compete by the production of siderophores (Deriu *et al.*, 2014). Litwak *et al.*, (2019)  
178 shows that they compete each other for oxygen in the gut environment. Also, fierce interference  
179 competition occurs among different species of this group by producing colicins and microcins  
180 (Nedialkova *et al.*, 2014; Sassone-Corsi *et al.*, 2016).

### 181 *Territorial conflict results in tragedy of commons*

182 Further, competition experiments were performed with UPEC against all the isolates. The relative  
183 fitness between the monoculture and coculture of the organism was calculated, as it gives an insight  
184 into the kind of interaction in the coculture between the UPEC and the isolate. A relative fitness  
185 value  $\approx 1$  indicates neutral interaction between both, and a value  $< 1$  for both species indicate  
186 cooperation, due to increased fitness payoff in coculture than monoculture. If either of the  
187 organism in the coculture has a relative fitness value  $< 1$ , then it is possibly exploiting the other for  
188 its benefit. If the relative fitness value of both the isolate and UPEC is  $> 1$ , it indicates tragedy of  
189 commons, where both the organisms reduced its absolute fitness when in coculture.

190 In planktonic growth, the relative fitness of both UPEC and the isolate was significantly  $> 1$  in the  
191 case of A1 and T1, suggesting both the organisms tragedized during coculture (Figure 4a, S6a and  
192 S6e), although the isolate T1 was relatively fitter than UPEC (Figure 4c). The fitness of UPEC  
193 monoculture was significantly higher than coculture, with B1 and C1 isolates (Figure 4a, S6b and  
194 S6c), but the fitness of isolates in either mono or coculture did not change. However, the fitness  
195 of B1 and C1 were significantly higher in the coculture than UPEC. Isolate P1 and UPEC possibly  
196 had a neutral interaction, thus no significant positive or negative payoff was observed on its fitness

197 (Figure 4a and S6d). Coculture of UPEC with the isolate Z1 enhanced the fitness payoff of UPEC  
198 than monoculture but reduced the payoff of Z1 in coculture relatively to the monoculture ( $n=4$ ,  
199  $P<0.01$ , one sample  $t$  test) (Figure 4a). Due to growth inconsistencies, competition experiments  
200 with isolate F1 was not determined.

201 In biofilm growth, fitness payoff significantly reduced for all the cultures in coculture biofilm  
202 relative to the monoculture (Figure 4b and S6). This clearly shows that a fierce competition occurs  
203 between the isolates and UPEC. As all the cultures belong to the Enterobacteriaceae family, which  
204 share similar resources, spiteful competition possibly occurred for the territorial space. However,  
205 relative fitness is higher for UPEC when there is competition between the isolates, A1, C1 and, T1  
206 (Figure 4d). The relative fitness in competition with P1 and Z1 was nearly 1.0 (Figure 4d).  
207 Nevertheless, the isolate B1 emerged with higher fitness value relatively than UPEC even in  
208 biofilm growth (Figure 4d).

209 Matrix production by the species push the biofilm cells upwards, which can access more oxygen  
210 and nutrients and suffocate the non-producers (Xavier and Foster, 2007). Thus, matrix producers  
211 will have positive fitness payoff than the non-producers resulting in colonization of territory by  
212 producers. Significant reduction of fitness payoff in coculture than monoculture between the  
213 isolates and UPEC for territorial colonization of the surface indicate tragedy of commons. The  
214 plastic surface of the microtiter plate's well is the intact common good and, matrix secretion favors  
215 the producer to colonize the surface.

216

217

218 *Salmonella enterica* B1 competitively excludes UPEC in biofilm

219 As the isolate B1, which was identified as *Salmonella enterica* (Figure 3) exhibited matrix  
220 inhibition and higher fitness in competition experiments with UPEC (Figure 4), we transformed  
221 plasmids expressing fluorescent proteins in both *S. enterica* B1 and the UPEC to observe  
222 microscopically the spatial arrangement of the cell types. *S. enterica* B1 outcompeted UPEC in the  
223 submerged biofilm on glass slide (Figure 5a). Quantification of the images revealed that the  
224 biomass and substratum coverage was higher for UPEC in the monoculture biofilm that  
225 significantly reduced in coculture (Figure 5b and S7). Biomass and substratum coverage increased  
226 significantly to *S. enterica* B1 in the coculture than monoculture (Figure 5b and S7). In submerged  
227 biofilm, the sum total of biomass was significantly high in coculture than the sum of monoculture  
228 of both organisms (Mann-Whitney *U* test,  $P < 0.02$ ,  $n = >20$ ) (Figure S7), implying that the *S.*  
229 *enterica* B1 and UPEC could increase their overall productivity in submerged biofilm, but *S.*  
230 *enterica* B1 predominates. Monoculture productivity of the *S. enterica* B1 was significantly lesser  
231 than UPEC, but *S. enterica* B1 increased its biomass in coculture (Figure S7a). The *S. enterica* B1  
232 also significantly increased its substratum coverage in coculture than the monoculture (Mann-  
233 Whitney *U* test,  $P < 0.02$ ,  $n = >20$ ), though the overall coverage of both mono and coculture was  
234 similar (Figure S7b). We speculate that the matrix inhibition of UPEC might have favored the *S.*  
235 *enterica* B1 to colonize the surface, thus suffocating UPEC in the biofilm, similar to the model  
236 proposed by Xavier and Foster (2007). Conflicts between *Salmonella* and *E. coli* in different  
237 contexts have been reported (Nedialkova *et al.*, 2014; Sassone-Corsi *et al.*, 2016; Deriu *et al.*,  
238 2014; Litwak *et al.*, 2019), but here we observed the territorial conflict among these two species  
239 in the context of biofilm formation, where the *S. enterica* B1 competitively excluded UPEC.

240

## 241 **Concluding Remarks**

242 The predominant survival strategy of bacteria in host and non-host conditions are as biofilm.  
243 Matrix is the most important component for biofilm bacteria to colonize surfaces, thus targeting it  
244 will be a superior strategy to treat pathogenic biofilms. However, natural products released by  
245 microbes during competition for territorial space could be potentially exploited for discovering  
246 novel antibiofilm compounds. Modern idea of infection therapy is based on antibiotics, which was  
247 discovered by Alexander Fleming and currently, around 69% of antimicrobials are from natural  
248 products (Pham *et al.*, 2019). Also, there is a renewed interest in discovering drugs from natural  
249 products (Waldetoft *et al.*, 2019). The simple screening assay that we developed in this study to  
250 isolate bacteria that could inhibit the matrix production in competition for territorial space based  
251 on the congo red agar test, could potentially be used for high-throughput screening of natural  
252 antibiofilm compounds (Figure 1).

253 Our study also gives an insight that bacterial species may compete for territorial colonization by  
254 inhibiting matrix, thus suppressing biofilm of the competing species. Particularly, among the  
255 species that ecologically compete for similar resources, in this case the Enterobacteriaceae family.  
256 The common resource for the species is the substratum surface and competitive exclusion of UPEC  
257 was observed by some members of Enterobacteriaceae where Salmonella was more effective. In  
258 this era of antibiotic resistance, such strategies, where non-pathogenic species that competitively  
259 exclude pathogen colonization by intervening in its matrix production could potentially be  
260 screened to develop probiotics.

## 261 **Experimental Procedures**

262 *Bacterial strain and growth conditions*

263 Uropathogenic *E. coli* UTI89 (henceforth referred to as UPEC) strain (gifted by Prof. Matthew A.  
264 Mulvey, University of Utah) was used for all the experiments. The media used for culturing was  
265 Yeast Extract Casamino Acids (YESCA) (Yeast Extract 0.5g/L Casamino Acids 10g/L) (Wu et al.  
266 2012).

#### 267 *Screening for bacterial strains that could inhibit biofilm matrix of UPEC*

268 In YESCA media supplemented with Congo red dye, 40  $\mu\text{g mL}^{-1}$  and Coomassie brilliant blue, 20  
269  $\mu\text{g mL}^{-1}$ , biofilm matrix producing *E. coli* forms red, dry and rough morphology (RDAR) and  
270 absence of matrix production will give smooth and white color (SAW) (Serra and Hengge, 2017).  
271 This was used as an assay for screening bacteria that could potentially inhibit matrix production in  
272 UPEC. Several soil samples near domestic wastewater in Thanjavur, Tamil Nadu, India were  
273 collected in a sterile container, which were serially diluted in sterile Phosphate Buffered Saline  
274 (PBS) and spread plated on congo red (CR) agar plate. Around 10  $\mu\text{l}$  of PBS-washed overnight-  
275 grown UPEC culture was spotted on the CR agar plate that was incubated for 3 days at 25  $^{\circ}\text{C}$ .  
276 Surrounding colonies of the UPEC that formed SAW morphotype were picked and isolated in LB  
277 medium. Pure colonies of bacterial isolates were validated for their influence on UPEC colony  
278 morphology by the same method.

#### 279 *Preparation and physicochemical analysis of culture supernatants*

280 The supernatant from pure culture of selected soil isolates were prepared according to Farmer *et*  
281 *al.*, (2014) but with modifications as follows. We used a cell-free supernatant from colony (CFSC)  
282 or Competition-Sensing Independent Supernatant (CSIS) wherein, the CFSC was collected by  
283 growing a lawn of the bacterial isolate in YESCA agar, spotting UPEC in the plate and, incubating  
284 it for three days. The bacterial isolate's cells that were in proximity to the UPEC spot were scraped

285 with the pipette tip and added in sterile YESCA broth, which was centrifuged at 5000 rpm for 10  
286 mins and filter sterilized with a 0.22  $\mu\text{m}$  nylon-66 membrane (HiMedia). For CSIS, the bacterial  
287 isolate's cells were grown in YESCA broth for 3 days at 25°C in static condition, which was  
288 centrifuged at 5000 rpm for 10 mins and filter sterilized (HiMedia). The resulting culture  
289 supernatants were stored at 4°C and used for further experiments.

290 The cell-free supernatants were treated with either 2-Mercaptoethanol (BME) (SRL), Trypsin,  
291 Proteinase K (1 mg ml<sup>-1</sup>) (HiMedia) or heat (50 °C for 1 hour). The treated cell-free supernatants  
292 were tested for their influence on biofilm formation or added into the wells of CR agar plated with  
293 a lawn of UPEC to determine its activity on matrix production.

#### 294 *Biofilm assays and fluorescence microscopy*

295 The microtiter plate assay in 96 wells was used to quantify the formation of partially submerged  
296 biofilm. Briefly, around 10<sup>7</sup> mL<sup>-1</sup> cells of UPEC were dispensed from overnight grown culture to  
297 microtiter wells containing YESCA broth and incubated for 24h at 37 °C in static condition. After  
298 rinsing to remove planktonic cells, the biofilm was stained by crystal violet (CV) and de-stained  
299 with 70% ethanol to quantify the biomass at 595 nm in a plate reader (Tecan Sunrise).

300 Dispersal studies of preformed biofilm was done according to Prasad *et al.*, (2017), where the  
301 above-said procedure was followed to form biofilm on the surface of microtiter wells for 24 hours.  
302 Later, the media was decanted, the wells were rinsed thrice with PBS and 250  $\mu\text{l}$  of the sterile  
303 supernatant from the isolates was added and incubated for 1 hour at 37 °C. For the control wells,  
304 250  $\mu\text{l}$  of the sterile PBS was added. Later, the residual biomass was stained with CV followed by  
305 de-staining and the absorbance were read at 600 nm to quantify the biomass.

306 Fluorescence imaging of biofilm was done according to Miryala *et al.* (2019). Nucleic acid stain,  
307 SYTO9 was used to stain the biofilm cells which was observed under fluorescence microscope  
308 (Nikon Eclipse Ni-U). Twenty randomly taken images were processed for auto-thresholding  
309 technique and the intensity (as proxy for biomass) and area coverage (substratum coverage) was  
310 measured in the ImageJ software (<https://imagej.nih.gov/ij/index.html>).

### 311 *Identification of the bacterial isolates*

312 The bacterial isolates were identified by sequencing the 16S rRNA genes. Colony PCR was  
313 performed with 27f (GAGAGTTTGATCCTGGCTCAG) and 1541r  
314 (AAGGAGGTGATCCAGCCGC) universal primers. Amplicons were purified by standard  
315 procedures and sequencing was done by Eurofins India. Phylogenetic analysis was done using  
316 neighbor-joining method in the MEGA software version 7 (Kumar *et al.*, 2016). Sequence-  
317 matched results were submitted to the GenBank and the bacterial isolates were submitted to  
318 National Centre for Microbial Resource, National Centre for Cell Science, Government of India  
319 (Table S1).

### 320 *Competition experiments*

321 Competition experiments were performed in both planktonic and biofilm growth between the  
322 isolates and UPEC. The initial inoculum was  $10^7$  CFU mL<sup>-1</sup> for the monoculture or coculture  
323 experiments and it was performed in YESCA medium. For coculture experiments, the antibiotic  
324 sensitivity profile of selected isolates was tested and contrasting antibiotics were chosen for  
325 plating. UPEC was sensitive to ampicillin and the isolates B1, P1, and Z1 were resistant to  
326 ampicillin which was used for enumeration and calculation of fitness values. The isolates A1, C1  
327 and T1 were transformed with pUltra plasmid (Mavridou *et al.*, 2016) having gentamycin cassette

328 and UPEC was transformed with pKD46 plasmid (Datsenko, and Wanner, 2000) having ampicillin  
329 cassette. Both UPEC and the bacterial isolate were mixed in 1:1 ratio in a centrifuge tube and along  
330 with the medium, dispensed in 24 well microtiter plate and, incubated at 25 °C for 24h. After  
331 incubation, fitness was calculated for planktonic growth by plating in corresponding antibiotic  
332 containing media plates. For biofilm growth, the wells were rinsed thrice with PBS and scraped  
333 with a sterile rubber policeman to remove the biofilm cells that was plated on selective antibiotic  
334 plates for enumeration. Fitness was calculated as Malthusian parameter  $M = \ln(N_1/N_0)$ , where  $N_0$   
335 is the initial cell number at 0 hour and  $N_1$  is the final cell number at 24 hours of incubation (Lenski  
336 *et al.*, 1991). The absolute fitness was calculated for both monoculture and coculture between  
337 UPEC and the isolate. The relative fitness between monoculture and coculture and, also between  
338 the UPEC and the isolate in coculture experiments, were calculated by dividing  
339 monoculture/coculture and UPEC/isolate respectively.

340 The plasmids, pFPV expressing either GFP or cherry red (Valdivia and Falkow, 1996, Drecktrah  
341 *et al.*, 2008) were transformed by electroporation into the isolate B1 and UPEC. Competition  
342 experiment was performed by inoculating the UPEC and the isolate in 1:1 ( $10^7$  CFU mL<sup>-1</sup>) ratio in  
343 a petri dish containing a glass slide with YESCA broth and incubated at 25 °C for 24h. After  
344 incubation, glass slide was taken out, rinsed with PBS, dried and, observed under the fluorescent  
345 microscope (Nikon Eclipse Ni-U).

#### 346 **Acknowledgements**

347 CSS thanks financial support provided by Science and Engineering Research Board, Dept. of  
348 Science and Technology, Govt. of India (CRG/2018/001827) to conduct this study. We thank  
349 SASTRA Deemed University for the infrastructure, and SM and SC thanks the University for



350 providing teaching assistantship (TA). We also thank DST-FIST funded fluorescence microscopy  
351 facility (SR/FST/ETI-331/2013).

### 352 **Authors' contribution**

353 SM and CSS conceptualized the study; SM and SC performed the experiments; SM and CSS  
354 analyzed the data and wrote the paper. All authors read and approved the final manuscript.

### 355 **References**

356 Anastasi EM, Matthews B, Stratton HM, Katouli M. (2012) Pathogenic *Escherichia coli* found in  
357 sewage treatment plants and environmental waters. *Appl Environ Microbiol* 78: 5536–5541.

358 Blount ZD. (2015) The unexhausted potential of *E. coli*. *elife* 4: 1–12.

359 Cornforth DM, Foster KR. (2013) Competition sensing: the social side of bacterial stress  
360 responses. *Nat Rev Microbiol* 11: 285–293.

361 Datsenko KA, Wanner BL. (2000) One-step inactivation of chromosomal genes in *Escherichia*  
362 *coli* K-12 using PCR products. *Proc Natl Acad Sci U S A* 97: 6640–6645.

363 DePas WH, Syed AK, Sifuentes M, Lee JS, Warshaw D, Saggari V, Csankovszki G, Boles BR,  
364 Chapman MR. (2014) Biofilm formation protects *Escherichia coli* against killing by  
365 *Caenorhabditis elegans* and *Myxococcus xanthus*. *Appl Environ Microbiol* 80: 7079–7087.

366 Deriu E, Liu JZ, Pezeshki M, Edwards R a., Ochoa RJ, Contreras H, Libby SJ, Fang FC, Raffatellu  
367 M. (2013) Probiotic bacteria reduce *Salmonella* Typhimurium intestinal colonization by  
368 competing for iron. *Cell Host Microbe* 14: 26–37.

- 369 Dragoš A, Kovács ÁT. (2017) The Peculiar functions of the bacterial extracellular matrix. Trends  
370 Microbiol 25: 257–266.
- 371 Drecktrah D, Levine-Wilkinson S, Dam T, Winfree S, Knodler LA, Schroer TA, Steele-Mortimer  
372 O. (2008) Dynamic behavior of *Salmonella*-induced membrane tubules in epithelial cells.  
373 Traffic 9: 2117–2129.
- 374 Farmer JT, Shimkevitch AV, Reilly PS, Mlynek KD, Jensen KS, Callahan MT, Bushaw-Newton  
375 KL, Kaplan JB. (2014) Environmental bacteria produce abundant and diverse antibiofilm  
376 compounds. J Appl Microbiol 2014 117:1663–1673.
- 377 Flemming HC, Wingender J, Szewzyk U, Steinberg P, Rice SA, Kjelleberg S. (2016) Biofilms:  
378 an emergent form of bacterial life. Nat Rev Microbiol 14: 563–575.
- 379 Flemming HC, Wuertz S. (2019) Bacteria and Archaea on Earth and their abundance in biofilms.  
380 Nat Rev Microbiol 17: 247–260.
- 381 Flores-Mireles AL, Walker JN, Caparon M, Hultgren SJ. (2015) Urinary tract infections:  
382 epidemiology, mechanisms of infection and treatment options. Nat Rev Microbiol 13: 269–  
383 284.
- 384 Ghoul M, Mitri S. (2016) The ecology and evolution of microbial competition. Trends Microbiol  
385 24: 833–845.
- 386 Glover M, Moreira CG, Sperandio V, Zimmern P. (2016) Recurrent urinary tract infections in  
387 healthy and nonpregnant women. HHS Public Access 25: 1–8.
- 388 Kumar S, Stecher G, Tamura K. (2016) MEGA7: Molecular evolutionary genetics analysis version  
389 7.0 for bigger datasets. Mol Biol Evol 33: 1870–1874.

- 390 Leid JG. (2009) Bacterial biofilms resist key host defenses. *Microbe* 4: 66–70.
- 391 Lenski RE, Rose MR, Simpson SC, Tadler SC. (1991) Long-term experimental evolution in  
392 *Escherichia coli*. I. adaptation and divergence during 2,000 generations. *Am Nat* 138: 1315-  
393 1341.
- 394 Litvak Y, Mon KKZ, Nguyen H, Chanthavixay G, Liou M, Velazquez EM, Kutter L, Alcantara  
395 MA, Byndloss MX, Tiffany CR, Walker GT, Faber F, Zhu Y, Bronner DN, Byndloss AJ,  
396 Tsolis RM, Zhou H, Baumler AJ. (2019) Commensal Enterobacteriaceae protect against  
397 *salmonella* Colonization through Oxygen Competition. *Cell Host Microbe* 25:128–139.e5.
- 398 Mavridou DAI, Gonzalez D, Clements A, Foster KR. (2016) The pUltra plasmid series: A robust  
399 and flexible tool for fluorescent labeling of Enterobacteria. *Plasmid*;87-88:65–71.
- 400 Miryala S, Makala H, Yadavali SP, Venkatasubramanian U, Subbaiah N, Srinandan CS. (2020)  
401 Disperse red 15 (DR15) impedes biofilm formation of uropathogenic *Escherichia coli*.  
402 *Microb Pathog* 138: 103772.
- 403 Nedialkova LP, Denzler R, Koepfel MB, Diehl M, Ring D, Wille T, Gerlach RG, Stecher B.  
404 (2014) Inflammation fuels colicin Ib-dependent competition of *Salmonella* serovar  
405 Typhimurium and *E. coli* in Enterobacterial Blooms. *PLoS Pathog* 10(1): e1003844.
- 406 Nithya C, Pandian SK. (2010) The *in vitro* antibiofilm activity of selected marine bacterial culture  
407 supernatants against *Vibrio* spp. *Arch Microbiol* 192: 843–854.
- 408 Oliveira NM, Martinez-Garcia E, Xavier J, Durham WM, Kolter R, Kim W, Foster KR. (2015)  
409 Biofilm formation as a response to ecological competition. *PLoS Biol* 13: 1–23.

- 410 Pham J V, Yilma MA, Feliz A, Majid MT, Maffetone N, Walker JR, Kim E, Hyo Cho J, Reynolds  
411 JM, Song MC, Park SR, Yoon YJ. (2019) A review of the microbial production of bioactive  
412 natural products and biologics. *Front Microbiol* 10: 1–27.
- 413 Prasad YS, Miryala S, Lalitha K, Ranjitha K, Barbhaiwala S, Sridharan V, Maheswari CU,  
414 Srinandan CS, Nagarajan S. (2017) Disassembly of bacterial biofilms by the self-assembled  
415 glycolipids derived from renewable resources. *ACS Appl Mater Interfaces* 9: 40047–40058.
- 416 Whelan AP, Dietrich LEP, Newman DK. (2006) Rethinking “secondary” metabolism:  
417 physiological roles for phenazine antibiotics. *Nat Chem Biol* 2: 71–78.
- 418 Qvortrup K, Hultqvist LD, Nilsson M, Jakobsen TH, Jansen CU, Uhd J, Andersen JB, Nielsen TE,  
419 Givskov M, Tolker-Nielsen T. (2019) Small molecule anti-biofilm agents developed on the  
420 basis of mechanistic understanding of biofilm formation. *Front Chem* 7: 742.
- 421 Serra DO, Hengge R. (2017) Experimental detection and visualization of the extracellular matrix  
422 in macrocolony biofilms. In: Sauer K. (eds) *c-di-GMP Signaling. Methods in Molecular  
423 Biology*, Vol 1657. Humana Press, New York, NY.
- 424 Serra DO, Hengge R. (2019) Cellulose in Bacterial Biofilms. In: Cohen E., Merzendorfer H.  
425 (eds) *Extracellular sugar-based biopolymers matrices. Biologically-Inspired Systems*, vol  
426 12. Springer, Cham.
- 427 Sassone-Corsi M, Nuccio SP, Liu H, Hernandez D, Vu CT, Takahashi AA, Edward RA, Raffatellu  
428 M. (2016) Microcins mediate competition among Enterobacteriaceae in the inflamed gut.  
429 *Nature* 540: 280–283.

- 430 Shanmugam N, Baker MODG, Ball SR, Steain M, Pham CLL, Sunde M. (2019) Microbial  
431 functional amyloids serve diverse purposes for structure, adhesion and defence. *Biophys Rev*  
432 11: 287–302.
- 433 Solano C, García B, Valle J, Berasain C, Ghigo JM, Gamazo C, Lasa I. (2002) Genetic analysis of  
434 *Salmonella enteritidis* biofilm formation: Critical role of cellulose. *Mol Microbiol* 43: 793–  
435 808.
- 436 Soto SM, Smithson A, Horcajada JP, Martinez JA, Mensa JP, Vila J. (2006) Implication of biofilm  
437 formation in the persistence of urinary tract infection caused by uropathogenic *Escherichia*  
438 *coli*. *Clin Microbiol Infect* 12: 1034–1036.
- 439 Srinandan CS, Elango M, Gnanadhas DP, Chakravorty D. (2015) Infiltration of matrix-non-  
440 producers weakens the *Salmonella* biofilm and impairs its antimicrobial tolerance and  
441 pathogenicity. *Front Microbiol* 6: 1–12.
- 442 Tamadonfar KO, Omattage NS, Spaulding CN, Hultgren SJ. (2019) Reaching the end of the line:  
443 urinary tract infections. *Microbiol Spectr* 7: 1–16.
- 444 Valdivia RH, Falkow S. (1996) Bacterial genetics by flow cytometry: rapid isolation of *Salmonella*  
445 typhimurium acid-inducible promoters by differential fluorescence induction. *Mol.*  
446 *Microbiol.* 22, 367–378.
- 447 Valle J, Da Re S, Henry M, Fontaine T, Balestrino D, Latour-Lambert P, Jean-Marc Ghigo. (2006)  
448 Broad-spectrum biofilm inhibition by a secreted bacterial polysaccharide. *Proc Natl Acad*  
449 *Sci U S A* 103: 12558–12563.

450 Walker JN, Flores-Mireles AL, Lynch AJL, Pinkner C, Caparon MG, Hultgren SJ, Desai A. (2019)  
451 High-resolution imaging reveals microbial biofilms on patient urinary catheters despite  
452 antibiotic administration. *World J Urol*.

453 Waldetoft KW, Gurney J, Lachance J, Hoskisson PA, Brown SP. (2019) Evolving antibiotics  
454 against resistance: a potential platform for natural product development. *MBio* 10: 1–10.

455 Wu C, Lim JY, Fuller GG, Cegelski L. (2012) Quantitative analysis of amyloid-integrated biofilms  
456 formed by uropathogenic *Escherichia coli* at the air-liquid interface. *Biophys J*;103:464–471.

457 Xavier JB, Foster KR. (2007) Cooperation and conflict in microbial biofilms. *Proc Natl Acad Sci*  
458 U S A 104: 876–881.

459 Zhi S, Banting G, Stothard P, Ashbolt NJ, Checkley S, Meyer K, Otto S, Neumann NF. (2019)  
460 Evidence for the evolution, clonal expansion and global dissemination of water treatment-  
461 resistant naturalized strains of *Escherichia coli* in wastewater. *Water Res* 156: 208–222.

462

463

464

465

466

467

468

469 **Figures**

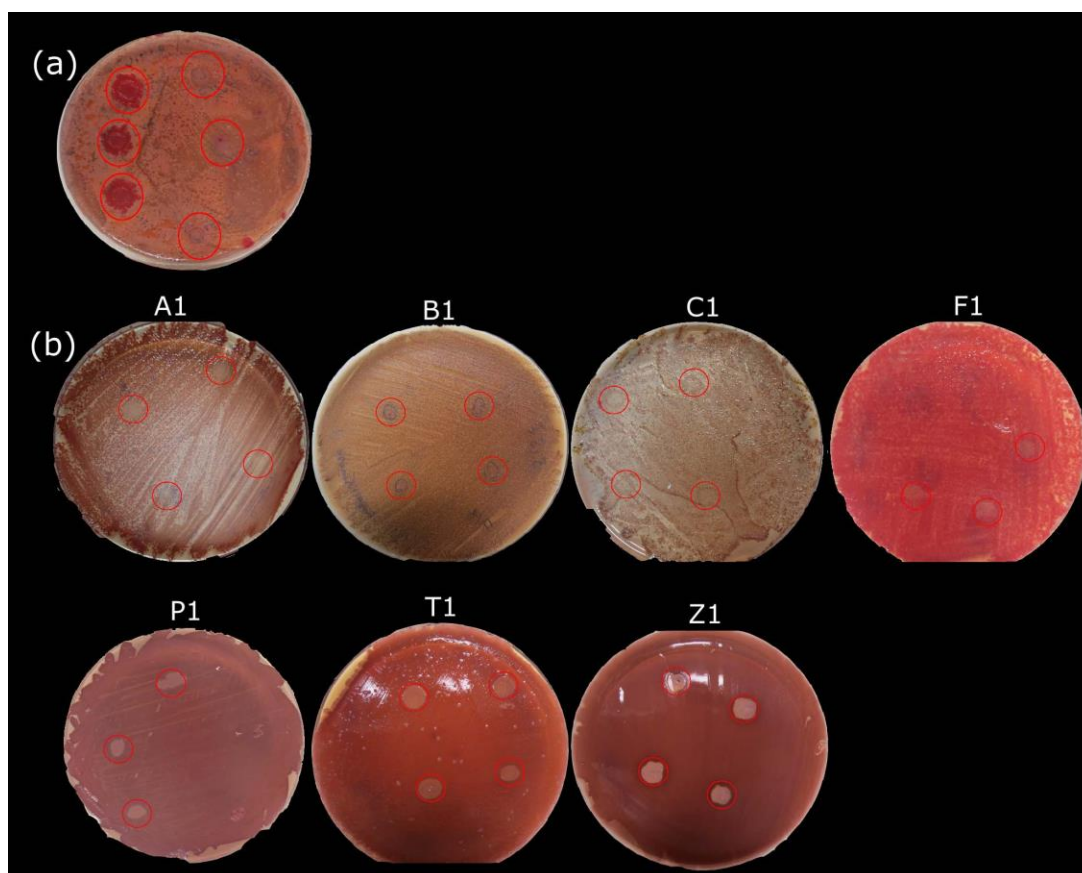

470

471 **Figure 1.** Screening for bacterial isolates on congo red (CR) media that could potentially inhibit  
472 matrix production in UPEC biofilms. Representative plates showing the (a) influence of soil  
473 bacterial isolates and (b) influence of pure culture of bacterial isolates. Alphabets on the plates  
474 refer to the name of the isolates. UPEC colonies in the CR plate are marked by red circle.

475

476

477

478

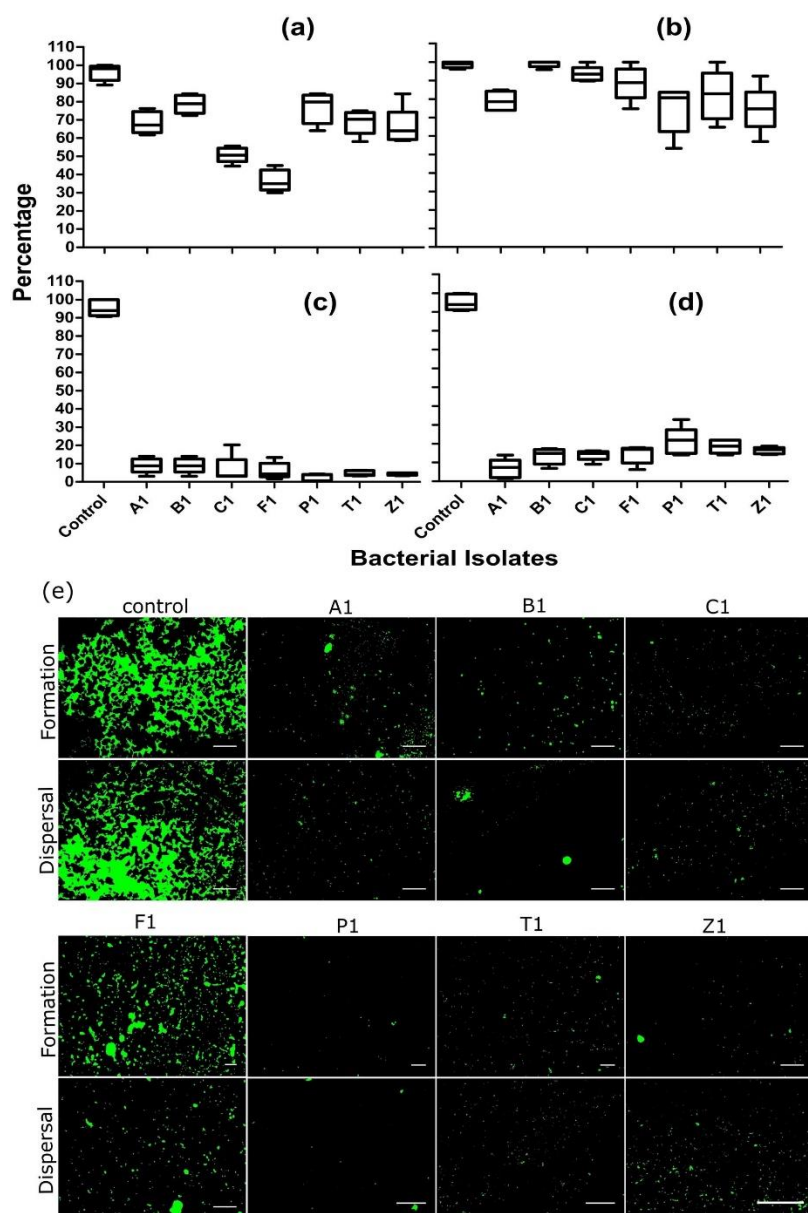

479

480 **Figure 2.** Influence of bacterial isolates on partially submerged biofilm (PSM) (a) planktonic  
481 growth, (b) adhesion, (c) biofilm formation and, (d) dispersal of UPEC biofilm.  $n = 5$ . The absolute  
482 values of absorbance are given in Figure S3. (e) Representative images of fluorescent microscopy  
483 showing biofilm formation and dispersal of preformed biofilm. Scale bar = 250 μm. Quantified  
484 data of images are shown in Figure S4.

485



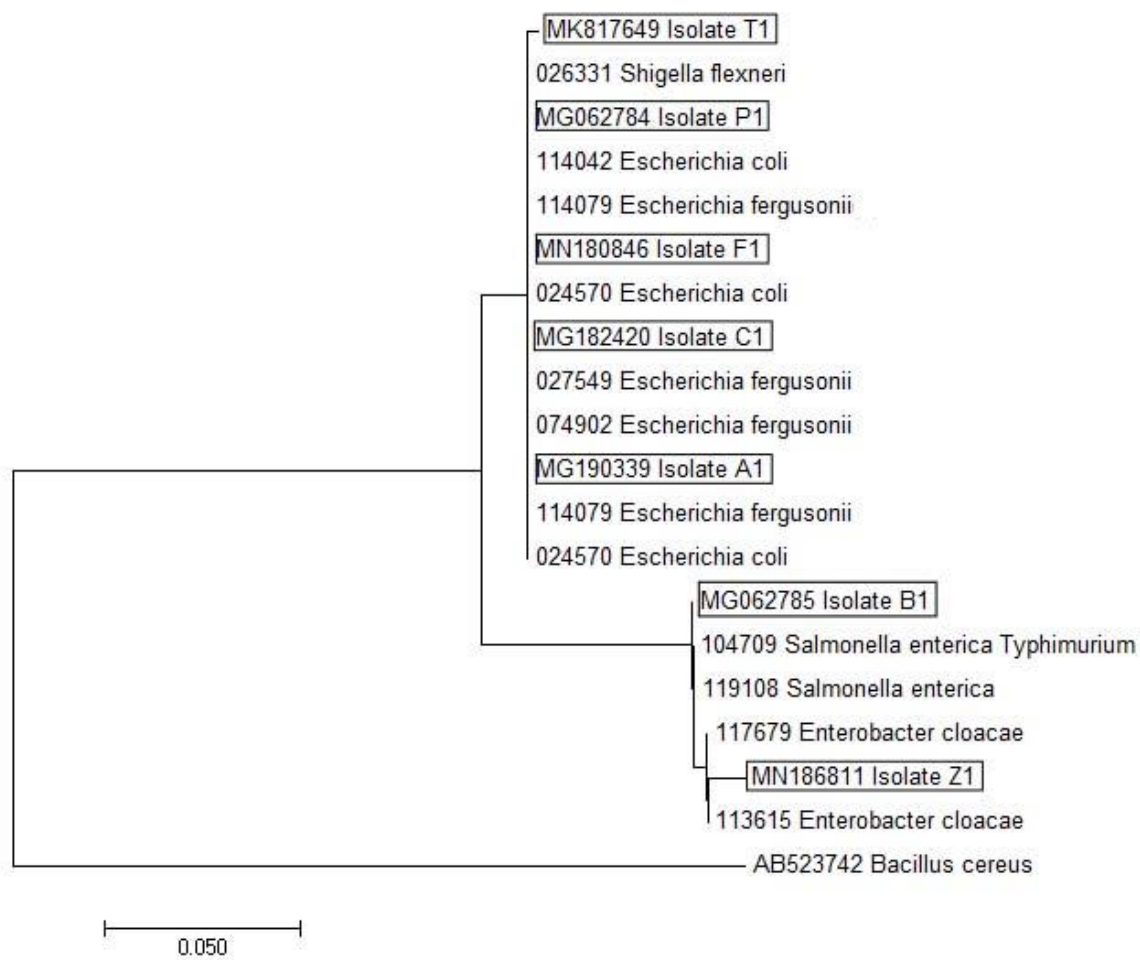

486

487 **Figure 3.** Phylogenetic tree of the isolates that show biofilm matrix inhibiting activity against  
488 UPEC. NCBI accession number is depicted before the isolate or organism name.

489

490

491

492

493

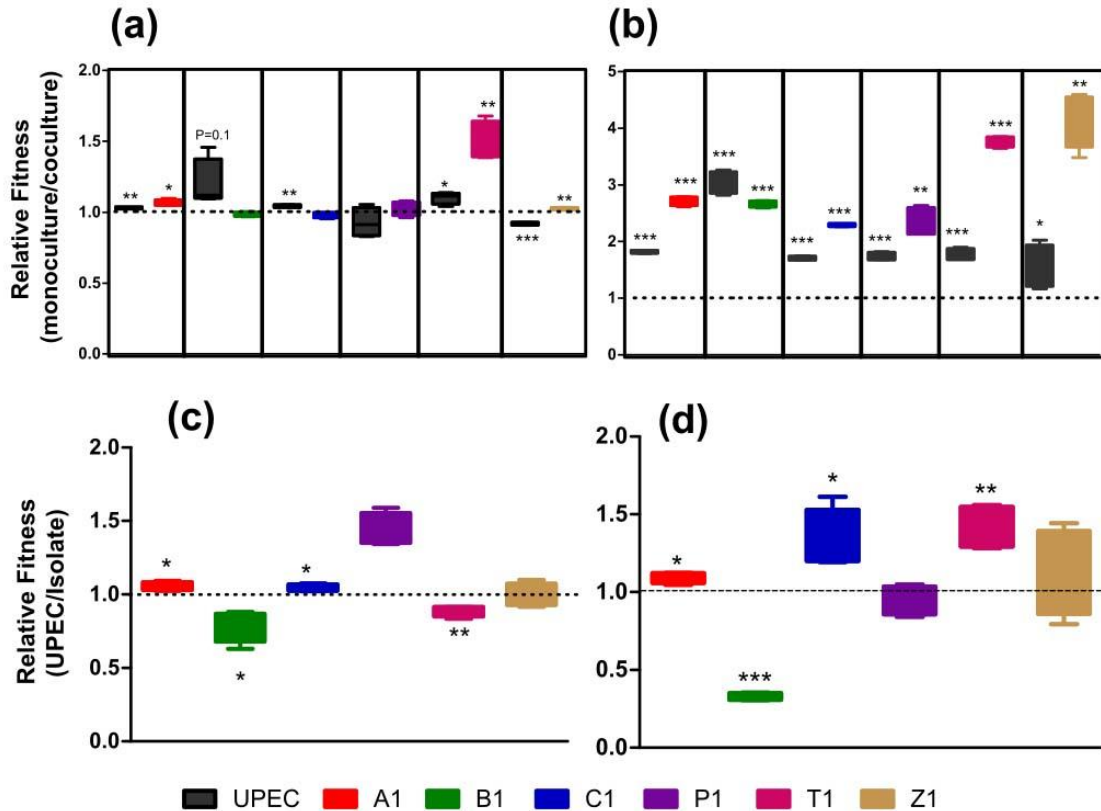

494

495 **Figure 4.** Relative fitness of UPEC and the bacterial isolate in monoculture and coculture with  
496 respective isolate during (a) planktonic growth and (b) biofilm growth. Relative fitness of the  
497 organisms in coculture experiments during (c) planktonic growth and (d) biofilm growth. The color  
498 codes suggest that the coculture experiments were performed with that isolate and the UPEC.  $n =$   
499 4, one sample  $t$  test was performed to determine significance with a theoretical mean of 1.00  
500 ( $*P < 0.05$ ,  $**P < 0.01$ ,  $***P < 0.001$ ). Absolute fitness values are shown in Figure S6.

501

502

503

504

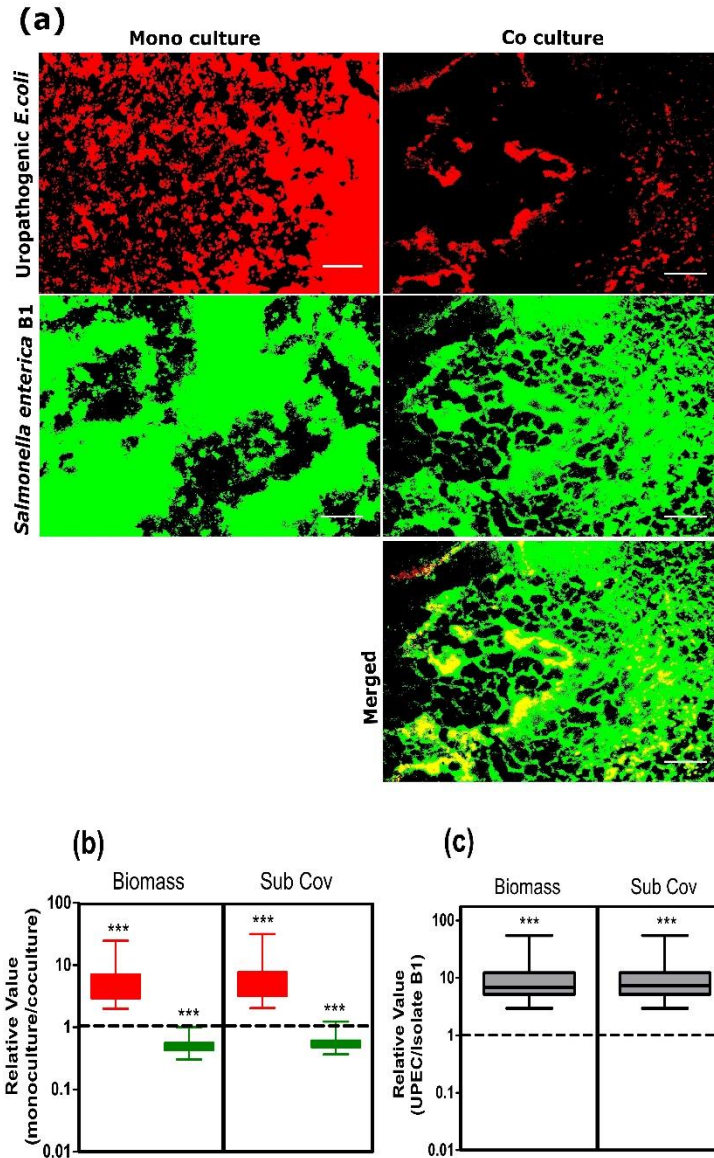

505

506 **Figure 5.** Competition in biofilm between UPEC and the *S. enterica* B1 (a) Representative  
507 fluorescence microscopic biofilm images in monoculture and coculture. Scale bar is 250 μm.  
508 Quantified data of the fluorescence microscopic biofilm images showing relative values of  
509 biomass and substratum coverage (sub cov) with respect to (b) monoculture is to coculture and (c)  
510 UPEC is to *S. enterica* B1 in the coculture. Red color in the image and graph is represented as  
511 UPEC and green is represented with the *S. enterica* B1.  $n = >20$ . One sample *t* test with a  
512 hypothetical value of 1.0 was performed to determine the significance (\*\*\*)  $P < 0.001$ .

## 513 **Legends of Supplementary Materials**

514 **Table S1.** Identity of the isolates with their corresponding NCBI and NCMR accession numbers

515 **Figure S1:** Influence of cell-free supernatant from colony of the isolates that were in contact with  
516 the UPEC colony on the (a) planktonic growth and (b) biofilm formation of UPEC.

517 **Figure S2:** Influence of different concentration of the Competition Sensing Independent  
518 Supernatant on UPEC biofilm formation

519 **Figure S3.** Influence of Competition Sensing Independent Supernatant (CSIS) of the isolates on  
520 UPEC (a) planktonic growth, (b) adhesion, (c) partially submerged biofilm (PSM) formation and,  
521 (d) dispersal of UPEC biofilm.

522 **Figure S4:** Quantified data of the fluorescence microscopic biofilm images (representative images  
523 shown in Figure 2e) of UPEC

524 **Figure S5.** Influence of physicochemical factors on the cell-free extract. (a) Representative image  
525 showing the color of the UPEC colony lawn in CR media indicative of matrix production.  $n = 2$ .  
526 (b) Planktonic growth and, (c) Biofilm formation of UPEC in presence of cell-free extract treated  
527 with BME, proteinase K, trypsin and, heat at 50 °C.  $n = 5$

528 **Figure S6.** Absolute fitness values of the isolate and UPEC in monoculture (mono) and coculture  
529 (co) in both planktonic growth and biofilm growth. (a) Isolate A1, (b) Isolate B1, (c) Isolate C1,  
530 (d) Isolate P1, (e) Isolate T1, and (f) Isolate Z1

531 **Figure S7.** Absolute values of biomass and substratum coverage of the monoculture and coculture  
532 biofilm of UPEC and *S. enterica* B1, quantified from the fluorescence images. (a) Biomass and (b)

533 Substratum coverage. Black boxes represent total biomass and coverage, red boxes are the UPEC  
534 and green represents the *S. enterica* B1.
